# Supplementary material for: Novel Pd-catalyzed electroless Au deposition method using a sulfite solution
Source: Royal Society of Chemistry journal article supplement (doi:10.1039/c5ra28168g), 2016-01-01
Supplement: c5ra28168g1.pdf [file c5ra28168g1.pdf]

1 **Novel Pd-Catalyzed Electroless Au Deposition Method using a Sulfite Solution**

2 Bing Li,<sup>a</sup> Ning Li,<sup>a,\*</sup> Deyu Li,<sup>a</sup> Yanqing Wang<sup>a</sup>

3 <sup>a</sup> Department of Applied Chemistry, Harbin Institute of Technology, Harbin 150001,

4 China

5 \* E-mail address: lininghit@263.net

1 The composition of Ni bath, Pd bath and gold bath are listed in Table SI, SII and SIII.

**Table SI.** Composition and operating conditions for Ni-P bath.

| Bath constituents                                  |        |
|----------------------------------------------------|--------|
| NiSO <sub>4</sub> •6H <sub>2</sub> O               | 20 g/L |
| NaH <sub>2</sub> PO <sub>2</sub> •H <sub>2</sub> O | 25 g/L |
| DL-Lactic acid                                     | 24 g/L |
| Propionic acid                                     | 4 g/L  |
| CH <sub>3</sub> COONa                              | 10 g/L |
| Propargyl alcohol propoxylate (PAP)                | 10 ppm |
| Aqueous ammonia (28%)                              | 25 ml  |
| pH(H <sub>2</sub> SO <sub>4</sub> , NaOH)          | 5.0    |
| Temperature                                        | 80°C   |

2

**Table SII.** Composition and operating conditions for electroless Pd-P bath.

| Bath constituents                         |         |
|-------------------------------------------|---------|
| PdSO <sub>4</sub>                         | 10 mM   |
| Ethylenediamine                           | 0.2 M   |
| Reductant                                 | 0.1 M   |
| Na <sub>2</sub> HPO <sub>4</sub>          | 0.2 M   |
| stabilizer                                | 0.01 mM |
| pH(H <sub>2</sub> SO <sub>4</sub> , NaOH) | 6.5     |
| Temperature                               | 65°C    |

3

**Table SIII.** Composition and operating conditions for gold bath.

| Bath constituents                                                |         |
|------------------------------------------------------------------|---------|
| Na <sub>3</sub> Au(SO <sub>3</sub> ) <sub>2</sub>                | 5 mM    |
| Na <sub>2</sub> SO <sub>3</sub>                                  | 0.3 M   |
| Na <sub>2</sub> S <sub>2</sub> O <sub>3</sub> •5H <sub>2</sub> O | 5 mM    |
| Na <sub>2</sub> HPO <sub>4</sub>                                 | 0.2 M   |
| EDTA-2Na                                                         | 0.025 M |
| pH(H <sub>2</sub> SO <sub>4</sub> , NaOH)                        | 6.5     |
| Temperature                                                      | 65°C    |

4

5

1 The ENIG process and the added Pd interlayer process are shown in Table SIV

**Table SIV.** Specifications of the process of Pre-treatment, Electroless Ni-P, Electroless Pd-P and Electroless gold

| Process          | Electrodeposited layer                                           |
|------------------|------------------------------------------------------------------|
| Pre-treatment    | degreasing and pickling<br>palladium activation                  |
| Electroless Ni-P | Ni-P (7~9wt.% P)<br>Thickness: 4 $\mu\text{m}$<br>Time: 20 min   |
| Electroless Pd-P | Pd-P (2~3wt.% P)<br>Thickness: 0.05 $\mu\text{m}$<br>Time: 5 min |
| Electroless gold | Au (100wt.%)<br>Operating temperature: 65°C<br>pH: 6.5           |

2
